# Supplementary material for: Lithiation mechanism of hierarchical porous MoO2nanotubes fabricated through one-step carbothermal reduction
Source: Royal Society of Chemistry journal article supplement (doi:10.1039/c3ta14123c), 2013-10-30
Supplement: c3ta14123c.pdf [file c3ta14123c.pdf]

## Electronic Supplementary information

### **Lithiation Mechanism of Hierarchical Porous MoO<sub>2</sub> Nanotubes Fabricated through One-step Carbothermal Reduction**

Hao-Jie Zhang,<sup>a</sup> Jie Shu,<sup>b</sup> Kai-Xue Wang,<sup>a\*</sup> Xiao-Ting Chen,<sup>a</sup> Yan-Mei Jiang,<sup>a</sup> Xiao

Wei<sup>a</sup> and Jie-Sheng Chen<sup>a\*</sup>

*<sup>a</sup>School of Chemistry and Chemical Engineering, Shanghai Jiao Tong University,  
Shanghai, China*

*<sup>b</sup>Faculty of Materials Science and Chemical Engineering, Ningbo University,  
Zhejiang, China*

*Email: k.wang@sjtu.edu.cn (KXW) and chemcj@sjtu.edu.cn (JSC)*

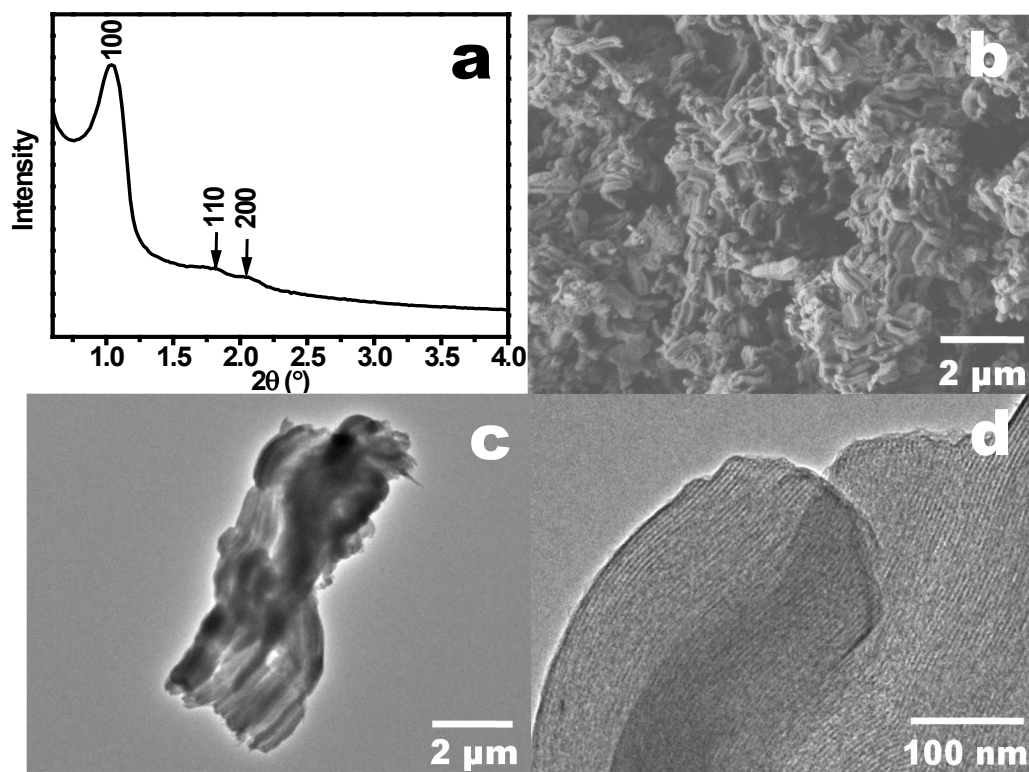

Fig. S1 (a) Low-angle XRD pattern, (b) SEM, and (c, d) TEM images of CMK-3.

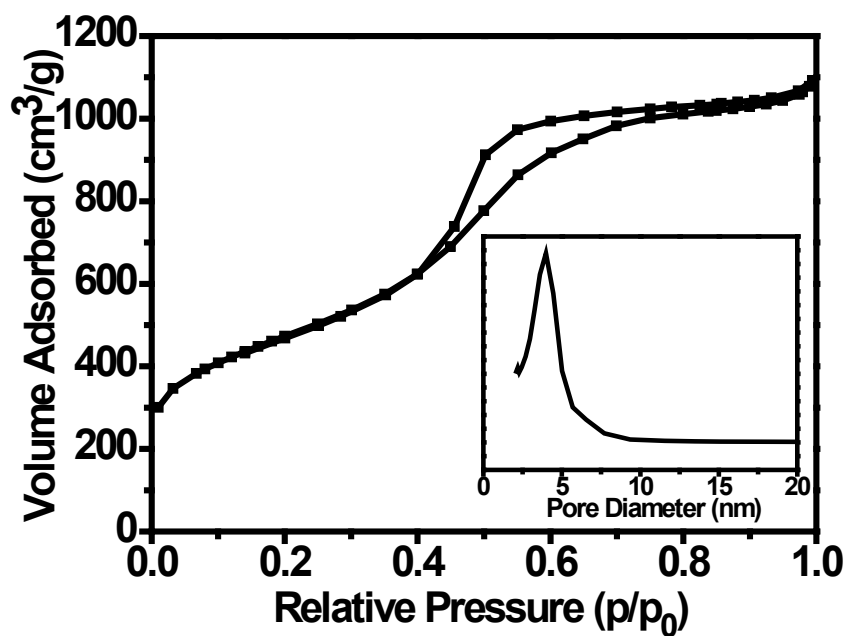

Fig. S2 Nitrogen adsorption/desorption isotherm and the corresponding pore size distribution curve (insert) of CMK-3.

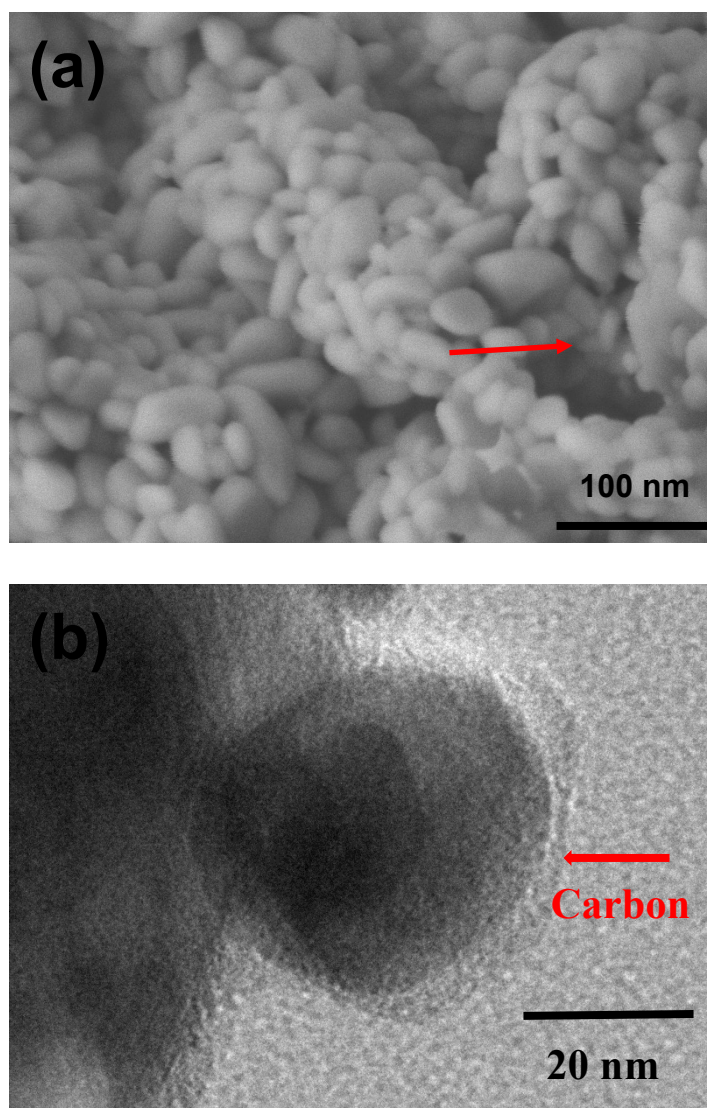

Fig. S3 (a) SEM and (b) TEM image of MoO<sub>2</sub> nanotubes.

The tubular structure can be observed from the open MoO<sub>2</sub> nanotubes. The diameter of the tube is less than 100 nm. A lot of MoO<sub>2</sub> nanoparticles are coated by a thin carbon layer as shown in the following TEM image. It is believed that thin carbon layer increases the electronic conductivity of these MoO<sub>2</sub> nanotubes and structure stability. Therefore, both the residual carbon and the hierarchical structure contribute to the good cycling performance of these MoO<sub>2</sub> nanotubes.

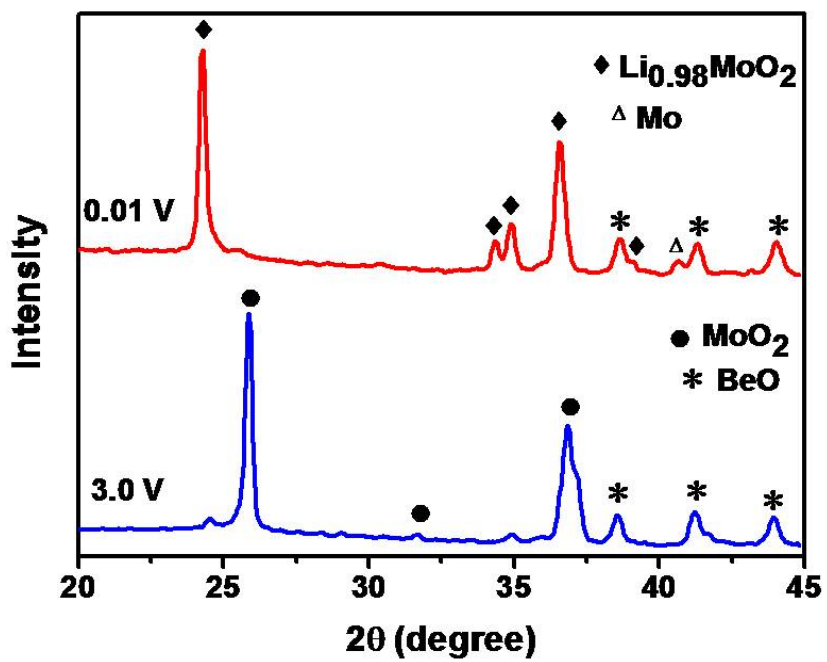

Fig. S4. *In situ* XRD patterns of the electrode before the first cycle and discharged to 0.01 V at the first cycle.

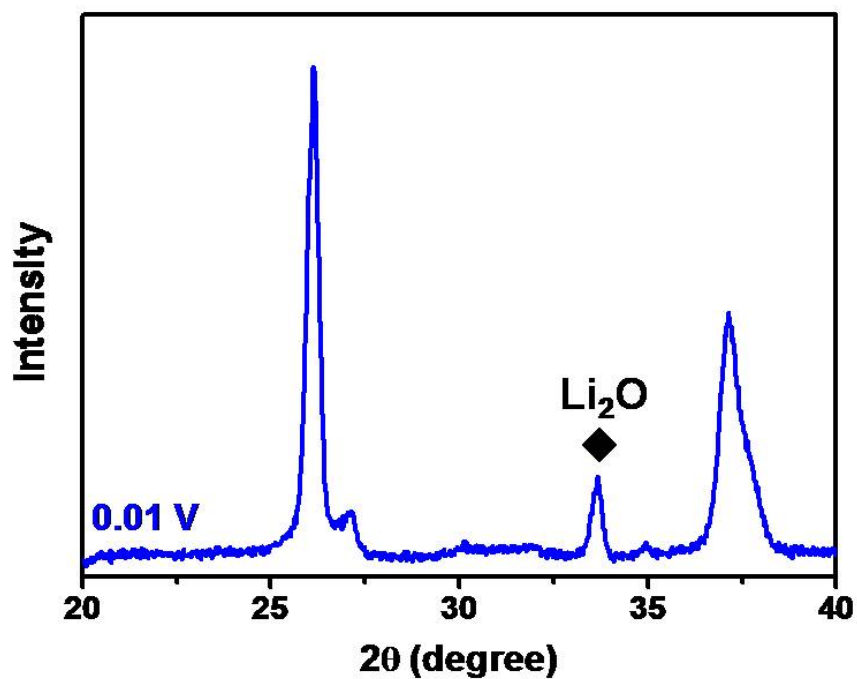

Fig. S5 *Ex situ* XRD pattern of the electrode after 30 cycles at a current density 40 mA/g. The diffraction peak of Li<sub>2</sub>O can be detected while the diffraction peak of Li<sub>0.98</sub>MoO<sub>2</sub> can't be observed.

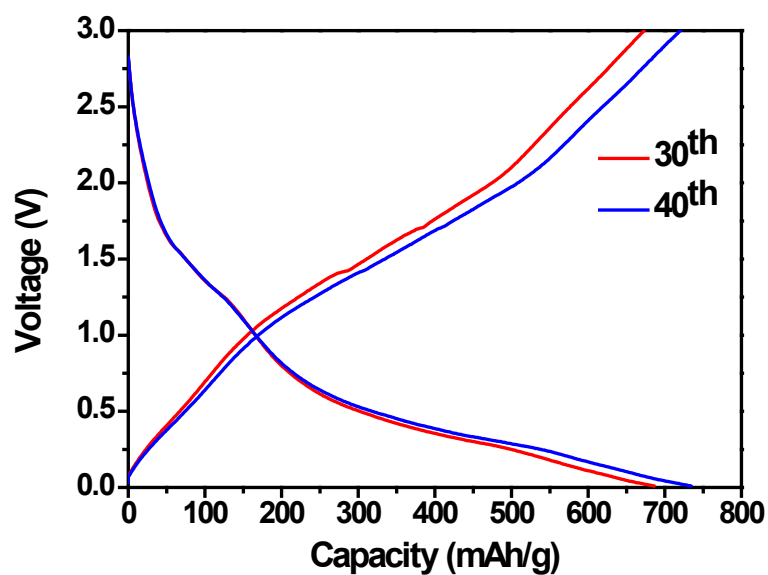

Fig. S6. Galvanostatic charge/discharge curves of the hierarchical porous MoO<sub>2</sub> at a current density of 0.5 A/g between 0.01~3.0 V. The two discharge plateaus (1.5 V and 1.3 V) and two charge plateaus (1.4 V and 1.7 V) of Li<sub>0.98</sub>MoO<sub>2</sub> cannot be observed after 30 cycles.
